# Supplementary material
Source: HighWire-hosted journal article supplement (https://jnm.snmjournals.org/highwire/filestream/101943/field_highwire_adjunct_files/0/245423_Supplemental_Data.pdf)
Supplement: 245423_Supplemental_Data.pdf [file 245423_Supplemental_Data.pdf]

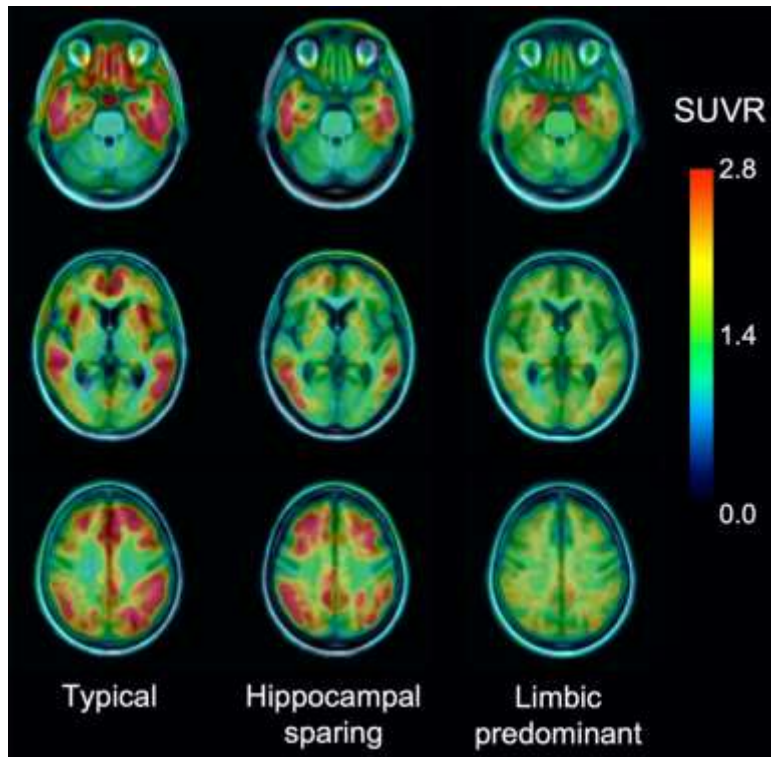

**Supplemental Figure 1.**

Tau imaging studies with  $^{18}\text{F}$ -flortaucipir PET images in severely cognitively impaired patients, two AD, one MCI, showing the three different pathological subtypes of AD: the typical presentation (left column, 76 y.o. female  $\text{A}\beta^+$  AD, MMSE 16) with widespread retention in both MTL and neocortical areas, limbic sparing (center column, 81 y.o. male  $\text{A}\beta^+$  MCI, MMSE 23) where tracer retention is primarily in the neocortex, and limbic predominant subtype (right column, 69 y.o. male  $\text{A}\beta^+$  AD, MMSE 20) with tracer retention mostly restricted to the mesial temporal cortex.

## Supplemental Table 1. Tau imaging tracers used in clinical studies

| Tracer                                                                       | Off target binding                                          | Non-specific/non-tau binding<br>Other issues                               |
|------------------------------------------------------------------------------|-------------------------------------------------------------|----------------------------------------------------------------------------|
| <sup>18</sup> F-THK523 <sup>1,2</sup>                                        | Basal ganglia                                               | low signal to noise                                                        |
| <sup>18</sup> F-T807 <sup>3-6</sup><br>(a.k.a. AV1451, Flortaucipir, TAUVID) | Choroid plexus, anterior midbrain, basal ganglia (meninges) | ~60% non-specific binding in A-CU                                          |
| <sup>18</sup> F-T808 <sup>7</sup>                                            | Basal ganglia, choroid plexus, anterior midbrain            | Defluorination                                                             |
| <sup>11</sup> C-PBB3 <sup>8-10@</sup>                                        | Longitudinal sinus, basal ganglia (choroid plexus)          | @radiolabeled lipophilic metabolite<br>(binding to other non-tau targets?) |
| <sup>18</sup> F-THK5105/ <sup>18</sup> F-THK5137 <sup>11-13</sup>            | Basal ganglia, anterior midbrain                            | (binding to MAO-B?)                                                        |
| <sup>18</sup> F-RO948 <sup>14-16</sup>                                       | Calvarium (choroid plexus, basal ganglia) anterior midbrain | (defluorination)                                                           |
| <sup>18</sup> F-GTP1 <sup>17,18</sup>                                        | Choroid plexus (basal ganglia) anterior midbrain            |                                                                            |
| <sup>18</sup> F-THK5351 <sup>19-21*</sup>                                    | Basal ganglia, anterior midbrain                            | *mainly binding to MAO-B                                                   |
| <sup>18</sup> F-PI2620 <sup>22-24</sup>                                      | Longitudinal sinus (scalp)                                  |                                                                            |
| <sup>18</sup> F-MK6240 <sup>25-28</sup>                                      | Meninges (anterior midbrain) Calvarium                      | (defluorination)                                                           |
| <sup>18</sup> F-Lanzoprazole <sup>29,30 #</sup>                              |                                                             | #low binding to tau in vivo                                                |
| <sup>18</sup> F-PM-PBB3 <sup>31</sup>                                        | Choroid plexus, anterior midbrain (basal ganglia)           |                                                                            |
| <sup>18</sup> F- JNJ-64326067 <sup>32,33</sup>                               |                                                             |                                                                            |

## REFERENCES

1. Fodero-Tavoletti MT, Okamura N, Furumoto S, et al. 18F-THK523: a novel in vivo tau imaging ligand for Alzheimer's disease. *Brain* 2011; **134**(Pt 4): 1089-100.
2. Villemagne VL, Furumoto S, Fodero-Tavoletti MT, et al. In vivo evaluation of a novel tau imaging tracer for Alzheimer's disease. *Eur J Nucl Med Mol Imaging* 2014; **41**(5): 816-26.
3. Devous M, Joshi A, Navitsky M, Kennedy I, Pontecorvo M, Mintun M. Identifying the topology of 18F-AV-1451 (also known as T807) PET tau images for diagnosis and prognosis in neurodegenerative disorders. *J Nucl Med* 2015; **56**((Suppl 3)): 139.
4. Xia CF, Arteaga J, Chen G, et al. [(18)F]T807, a novel tau positron emission tomography imaging agent for Alzheimer's disease. *Alzheimers Dement* 2013; **9**: 666-76.
5. Johnson KA, Schultz A, Betensky RA, et al. Tau positron emission tomographic imaging in aging and early Alzheimer disease. *Ann Neurol* 2016; **79**(1): 110-9.
6. Ossenkoppele R, Rabinovici GD, Smith R, et al. Discriminative Accuracy of [18F]flortaucipir Positron Emission Tomography for Alzheimer Disease vs Other Neurodegenerative Disorders. *JAMA* 2018; **320**(11): 1151-62.
7. Chien DT, Szardenings AK, Bahri S, et al. Early Clinical PET Imaging Results with the Novel PHF-Tau Radioligand [F18]-T808. *J Alzheimers Dis* 2014; **38**: 171-84.
8. Hashimoto H, Kawamura K, Takei M, et al. Identification of a major radiometabolite of [11C]PBB3. *Nucl Med Biol* 2015; **42**(12): 905-10.
9. Perez-Soriano A, Arena JE, Dinelle K, et al. PBB3 imaging in Parkinsonian disorders: Evidence for binding to tau and other proteins. *Mov Disord* 2017; **32**(7): 1016-24.
10. Shimada H, Higuchi M, Shinotoh H, et al. In vivo visualization of tau pathology in Alzheimer's disease patients by [11C]PBB3-PET. *Alzheimer & Dementia* 2013; **9**.
11. Okamura N, Furumoto S, Fodero-Tavoletti MT, et al. Non-invasive assessment of Alzheimer's disease neurofibrillary pathology using 18F-THK5105 PET. *Brain* 2014; **137**(Pt 6): 1762-71.
12. Chiotis K, Saint-Aubert L, Savitcheva I, et al. Imaging in-vivo tau pathology in Alzheimer's disease with THK5317 PET in a multimodal paradigm. *Eur J Nucl Med Mol Imaging* 2016; **43**(9): 1686-99.
13. Okamura N, Furumoto S, Harada R, et al. In vivo selective imaging of tau pathology in Alzheimer's disease with 18F-THK5117. *J Nucl Med* 2014; **55**(Suppl 1): 136.
14. Leuzy A, Smith R, Ossenkoppele R, et al. Diagnostic Performance of RO948 F 18 Tau Positron Emission Tomography in the Differentiation of Alzheimer Disease From Other Neurodegenerative Disorders. *JAMA Neurol* 2020; **77**(8): 955-65.
15. Smith R, Scholl M, Leuzy A, et al. Head-to-head comparison of tau positron emission tomography tracers [(18)F]flortaucipir and [(18)F]RO948. *Eur J Nucl Med Mol Imaging* 2020; **47**(2): 342-54.
16. Wong DF, Comley RA, Kuwabara H, et al. Characterization of 3 Novel Tau Radiopharmaceuticals, (11)C-RO-963, (11)C-RO-643, and (18)F-RO-948, in Healthy Controls and in Alzheimer Subjects. *J Nucl Med* 2018; **59**(12): 1869-76.
17. Sanabria Bohorquez S, Marik J, Ogasawara A, et al. [(18)F]GTP1 (Genentech Tau Probe 1), a radioligand for detecting neurofibrillary tangle tau pathology in Alzheimer's disease. *Eur J Nucl Med Mol Imaging* 2019; **46**(10): 2077-89.

18. Teng E, Ward M, Manser PT, et al. Cross-sectional associations between [(18)F]GTP1 tau PET and cognition in Alzheimer's disease. *Neurobiol Aging* 2019; **81**: 138-45.
19. Harada R, Furumoto S, Tago T, et al. Characterization of the radiolabeled metabolite of tau PET tracer 18F-THK5351. *Eur J Nucl Med Mol Imaging* 2016.
20. Harada R, Okamura N, Furumoto S, et al. 18F-THK5351: A Novel PET Radiotracer for Imaging Neurofibrillary Pathology in Alzheimer Disease. *J Nucl Med* 2016; **57**(2): 208-14.
21. Ng KP, Pascoal TA, Mathotaarachchi S, et al. Monoamine oxidase B inhibitor, selegiline, reduces 18F-THK5351 uptake in the human brain. *Alzheimers Res Ther* 2017; **9**(1): 25.
22. Brendel M, Barthel H, van Eimeren T, et al. Assessment of 18F-PI-2620 as a Biomarker in Progressive Supranuclear Palsy. *JAMA Neurol* 2020; **77**(11): 1408-19.
23. Mueller A, Bullich S, Barret O, et al. Tau PET imaging with (18)F-PI-2620 in Patients with Alzheimer Disease and Healthy Controls: A First-in-Humans Study. *J Nucl Med* 2020; **61**(6): 911-9.
24. Kroth H, Oden F, Molette J, et al. Discovery and preclinical characterization of [(18)F]PI-2620, a next-generation tau PET tracer for the assessment of tau pathology in Alzheimer's disease and other tauopathies. *Eur J Nucl Med Mol Imaging* 2019; **46**(10): 2178-89.
25. Salinas C, Lohith TG, Purohit A, et al. Test-retest characteristic of [(18)F]MK-6240 quantitative outcomes in cognitively normal adults and subjects with Alzheimer's disease. *J Cereb Blood Flow Metab* 2020; **40**(11): 2179-87.
26. Pascoal TA, Shin M, Kang MS, et al. In vivo quantification of neurofibrillary tangles with [(18)F]MK-6240. *Alzheimers Res Ther* 2018; **10**(1): 74.
27. Betthausen TJ, Cody KA, Zammit MD, et al. In Vivo Characterization and Quantification of Neurofibrillary Tau PET Radioligand (18)F-MK-6240 in Humans from Alzheimer Disease Dementia to Young Controls. *J Nucl Med* 2019; **60**(1): 93-9.
28. Walji AM, Hostetler ED, Selnick H, et al. Discovery of 6-(Fluoro-(18)F)-3-(1H-pyrrolo[2,3-c]pyridin-1-yl)isoquinolin-5-amine [(18)F]-MK-6240): A Positron Emission Tomography (PET) Imaging Agent for Quantification of Neurofibrillary Tangles (NFTs). *J Med Chem* 2016; **59**(10): 4778-89.
29. Kramer V, Brooks AF, Haeger A, et al. Evaluation of [(18)F]-N-Methyl lansoprazole as a Tau PET Imaging Agent in First-in-Human Studies. *ACS Chem Neurosci* 2020; **11**(3): 427-35.
30. Shao X, Carpenter GM, Desmond TJ, et al. Evaluation of [(11)C]N-Methyl Lansoprazole as a Radiopharmaceutical for PET Imaging of Tau Neurofibrillary Tangles. *ACS Med Chem Lett* 2012; **3**(11): 936-41.
31. Tagai K, Ono M, Kubota M, et al. High-Contrast In Vivo Imaging of Tau Pathologies in Alzheimer's and Non-Alzheimer's Disease Tauopathies. *Neuron* 2020.
32. Schmidt ME, Janssens L, Moechars D, et al. Clinical evaluation of [(18)F] JNJ-64326067, a novel candidate PET tracer for the detection of tau pathology in Alzheimer's disease. *Eur J Nucl Med Mol Imaging* 2020; **47**(13): 3176-85.
33. Rombouts FJR, Declercq L, Andres JI, et al. Discovery of N-(4-[(18)F]Fluoro-5-methylpyridin-2-yl)isoquinolin-6-amine (JNJ-64326067), a New Promising Tau Positron Emission Tomography Imaging Tracer. *J Med Chem* 2019; **62**(6): 2974-87.
